# Supplementary material for: The Relationship between Family Violence and Self-Control in Adolescence: A Multi-Level Meta-Analysis
Source: Int J Environ Res Public Health. 2018 Nov 5;15(11):2468. doi: 10.3390/ijerph15112468 (PMC6265739; doi:10.3390/ijerph15112468)
Supplement: Supplementary file 1 [file ijerph-15-02468-s001.xlsx]

## Sheet: Table
Table S1. Reviewed Studies, Sample Characteristics, Methods of Assessment, and Effect Sizes.
Study_ID	Author	PubYear	Journal	Excl_overlap	Country	Hofstede_individualism	Hofstede_power	Hofstede_masculinity	Study_ID_2	Sample	N_es	ES_design	Age	Age_cent10	Age_cent10_sq	time_lag	violence_items	violence	Informant_parenting	Alpha_parenting	term_sc	informant_sc	meaning_sc	alpha_sc	ES_ID	ES_gender_continious	ES	Informants_consistency	ES_count	ES_fisher	ES_VAR
9	Agbaria, Hamama, Orkibi	2016	Child Indicators Research	0	Israel	54	13	47	9		155	1	16.21	6.21	38.5641	0	Parent-child Conflict tactics Scale (Straus et al. 1998)	conflict tactics scale "mostly used scale for family violence"	1	0.84	Self-Control Skills	1	high scores high self-control	0.72	5	100	-0.03	1	1	-0.030009	0.00657895
93	Bradley, Corwyn	2007	Developmental Psychology	0	USA	91	40	62	1011	NICHD Study of Early Child Care and Youth Development (SECCYD)	1017	1	10.5	0.5	0.25	0	the Home Observation for Measurement of the Environment (HOME) Inventory	includes expressions of anger and annoyance, physical punishment, and intrusiveness, and conceptually similar to the corporal punishment measure		> .90 (interrater agreement)	self-control	2	higher sc	.82 to .87	61	50	-0.17	2	1	-0.171667	0.000986193
93	Bradley, Corwyn	2007	Developmental Psychology		USA	91	40	62	1011	NICHD Study of Early Child Care and Youth Development (SECCYD)	927	1	10.5	0.5	0.25	0	the Home Observation for Measurement of the Environment (HOME) Inventory			> .90 (interrater agreement)	self-control	2	higher sc	.82 to .87	71	50	-0.17	2	1	-0.171667	0.00108225
101	Brody, Ge	2001	Journal of Family Psychology	0	USA	91	40	62	101		120	1	11	1	1	0	chidlrens' answered the Family process scale (Brody et al., 1999) and parents' answered the physical punishment subscale of the Conflict Tactics Scale (Straus, 1979)	children's answer on how often discussion with each parent regarding alcohol use, religion, school, and prosocial behavior are characterized by conflict and parents' answer how often they disciplined using tactics such as spanking, slapping, or hiting with a belt	3	chidlren's answer was .73 and .83 for mother and father respectively and .95 for mothers and .93 for fathers	self-control	2	higher sc	> .90	85	48	-0.39	2	1	-0.4118	0.00854701
101	Brody, Ge	2001	Journal of Family Psychology		USA	91	40	62	101		120	1	11	1	1	0	chidlrens' answered the Family process scale (Brody et al., 1999) and parents' answered the physical punishment subscale of the Conflict Tactics Scale (Straus, 1979)		3	chidlren's answer was .73 and .83 for mother and father respectively and .95 for mothers and .93 for fathers	self-control	2	higher sc	> .90	86	48	-0.3	2	1	-0.30952	0.00854701
101	Brody, Ge	2001	Journal of Family Psychology		USA	91	40	62	101		120	1	11	1	1	0	chidlrens' answered the Family process scale (Brody et al., 1999) and parents' answered the physical punishment subscale of the Conflict Tactics Scale (Straus, 1979)		3	chidlren's answer was .73 and .83 for mother and father respectively and .95 for mothers and .93 for fathers	self-control	2	lower sc	> .90	89	48	-0.29	2	1	-0.298566	0.00854701
101	Brody, Ge	2001	Journal of Family Psychology		USA	91	40	62	101		120	1	11	1	1	0	chidlrens' answered the Family process scale (Brody et al., 1999) and parents' answered the physical punishment subscale of the Conflict Tactics Scale (Straus, 1979)		3	chidlren's answer was .73 and .83 for mother and father respectively and .95 for mothers and .93 for fathers	self-control	2	lower sc	> .90	90	48	-0.37	2	1	-0.388423	0.00854701
101	Brody, Ge	2001	Journal of Family Psychology		USA	91	40	62	101		120	1	12	2	4	0	chidlrens' answered the Family process scale (Brody et al., 1999) and parents' answered the physical punishment subscale of the Conflict Tactics Scale (Straus, 1979)		3	chidlren's answer was .73 and .83 for mother and father respectively and .95 for mothers and .93 for fathers	self-control	2	higher sc	> .90	93	48	-0.33	2	1	-0.342828	0.00854701
101	Brody, Ge	2001	Journal of Family Psychology		USA	91	40	62	101		120	1	12	2	4	0	chidlrens' answered the Family process scale (Brody et al., 1999) and parents' answered the physical punishment subscale of the Conflict Tactics Scale (Straus, 1979)		3	chidlren's answer was .73 and .83 for mother and father respectively and .95 for mothers and .93 for fathers	self-control	2	higher sc	> .90	94	48	-0.39	2	1	-0.4118	0.00854701
101	Brody, Ge	2001	Journal of Family Psychology		USA	91	40	62	101		120	1	12	2	4	0	chidlrens' answered the Family process scale (Brody et al., 1999) and parents' answered the physical punishment subscale of the Conflict Tactics Scale (Straus, 1979)		3	chidlren's answer was .73 and .83 for mother and father respectively and .95 for mothers and .93 for fathers	self-control	2	lower sc	> .90	97	48	-0.27	2	1	-0.276864	0.00854701
101	Brody, Ge	2001	Journal of Family Psychology		USA	91	40	62	101		120	1	12	2	4	0	chidlrens' answered the Family process scale (Brody et al., 1999) and parents' answered the physical punishment subscale of the Conflict Tactics Scale (Straus, 1979)		3	chidlren's answer was .73 and .83 for mother and father respectively and .95 for mothers and .93 for fathers	self-control	2	lower sc	> .90	98	48	-0.34	2	1	-0.354093	0.00854701
101	Brody, Ge	2001	Journal of Family Psychology		USA	91	40	62	101		120	2	12	2	4	1	chidlrens' answered the Family process scale (Brody et al., 1999) and parents' answered the physical punishment subscale of the Conflict Tactics Scale (Straus, 1979)		3	chidlren's answer was .73 and .83 for mother and father respectively and .95 for mothers and .93 for fathers	self-control	2	higher sc	> .90	101	48	-0.29	2	1	-0.298566	0.00854701
101	Brody, Ge	2001	Journal of Family Psychology		USA	91	40	62	101		120	2	12	2	4	1	chidlrens' answered the Family process scale (Brody et al., 1999) and parents' answered the physical punishment subscale of the Conflict Tactics Scale (Straus, 1979)		3	chidlren's answer was .73 and .83 for mother and father respectively and .95 for mothers and .93 for fathers	self-control	2	higher sc	> .90	102	48	-0.2	2	1	-0.202733	0.00854701
101	Brody, Ge	2001	Journal of Family Psychology		USA	91	40	62	101		120	2	12	2	4	1	chidlrens' answered the Family process scale (Brody et al., 1999) and parents' answered the physical punishment subscale of the Conflict Tactics Scale (Straus, 1979)		3	chidlren's answer was .73 and .83 for mother and father respectively and .95 for mothers and .93 for fathers	self-control	2	lower sc	> .90	105	48	-0.28	2	1	-0.287682	0.00854701
101	Brody, Ge	2001	Journal of Family Psychology		USA	91	40	62	101		120	2	12	2	4	1	chidlrens' answered the Family process scale (Brody et al., 1999) and parents' answered the physical punishment subscale of the Conflict Tactics Scale (Straus, 1979)		3	chidlren's answer was .73 and .83 for mother and father respectively and .95 for mothers and .93 for fathers	self-control	2	lower sc	> .90	106	48	-0.17	2	1	-0.171667	0.00854701
146	Cheung & Cheung	2008	Journal of Youth and Adolescence	0	Hong Kong	25	68	57	1001	‘‘Northbound Pleasures: Pattern of Cross-Border Deviance of Hong Kong Marginal Youths and Its Implications for Adolescent Deviance in Hong Kong,’’	1015	1	16	6	36	0	through two items asking the participant how often his/her parents had yelled at him/her and how often he/she had been physically punished or treated with force by his/her parents	Coercion	1	0.56	self-control	1	high scores more self-control	0.61	158	54	-0.184	1	1	-0.18612	0.000988142
147	Cheung, Cheung	2010	Sociological Perspectives	1	Hong Kong	25	68	57	1001	‘‘Northbound Pleasures: Pattern of Cross-Border Deviance of Hong Kong Marginal Youths and Its Implications for Adolescent Deviance in Hong Kong,’’	1015	1	16	6	36	0	2 items to ask how often the participants' parents yelled at him/her and how often he/she was physically punished or treated with force by his/her parents	Coercion	1	0.56	low self-control	1	high self-control	0.61	160	54	-0.216	1	1	-0.219457	0.000988142
219	Evans, Simons, Simons	2012	Journal of Youth and Adolescence	0	USA	91	40	62	1017	the Family andCommunity Health Study (FACHS)	418	1	14.5	4.5	20.25	0	how frequently(1=never; 4=always) when interacting with their pri-mary caregiver that this person becomes angry, shouts,yells, insults and swears, and threatens physical harm	when interacting with their pri-mary caregiver that this person becomes angry, shouts,yells, insults and swears, and threatens physical harm	1	0.77	low self-control	1	higher score lower self-control	0.73	373	100	-0.2977	1	1	-0.306994	0.00240964
219	Evans, Simons, Simons	2012	Journal of Youth and Adolescence		USA	91	40	62	1017	the Family andCommunity Health Study (FACHS)	418	1	14.5	4.5	20.25	0	often (1=never; 4=always) that their primary caregiverdisciplines them by slapping or striking with an objec		1	0.70	low self-control	1	higher score lower self-control	0.73	374	100	0.0166	1	1	0.0166015	0.00240964
219	Evans, Simons, Simons	2012	Journal of Youth and Adolescence		USA	91	40	62	1017	the Family andCommunity Health Study (FACHS)	361	1	14.5	4.5	20.25	0	how frequently(1=never; 4=always) when interacting with their pri-mary caregiver that this person becomes angry, shouts,yells, insults and swears, and threatens physical harm		1	0.77	low self-control	1	higher score lower self-control	0.73	377	0	-0.3422	1	1	-0.356582	0.0027933
219	Evans, Simons, Simons	2012	Journal of Youth and Adolescence		USA	91	40	62	1017	the Family andCommunity Health Study (FACHS)	361	1	14.5	4.5	20.25	0	often (1=never; 4=always) that their primary caregiverdisciplines them by slapping or striking with an objec		1	0.70	low self-control	1	higher score lower self-control	0.73	378	0	-0.1663	1	1	-0.167859	0.0027933
227	Feldman, Wentzel	1990	Journal of Educational Psychology	0	USA	91	40	62	227		65	1	11.5	1.5	2.25	0	interaction task	hostility refers to open hostility, sarcasm, put-downs, or mocking			restraint	3	better self-restraint	.87 for teacher-report and .85 for peer-report	389	0	-0.27	2	1	-0.276864	0.016129
227	Feldman, Wentzel	1990	Journal of Educational Psychology		USA	91	40	62	227		65	1	11.5	1.5	2.25	0	interaction task	hostility refers to open hostility, sarcasm, put-downs, or mocking			restraint	3	better self-restraint	.87 for teacher-report and .85 for peer-report	390	0	-0.16	2	1	-0.161387	0.016129
228	Feldman, Wentzel	1990	Journal of Early Adolescence	0	USA	91	40	62	228		92	1	11.5	1.5	2.25	0	7 items from the Weinberger Parenting Inventory (Weinberger et al., 1989) were used to assess parents' use of authoritarian and punitive disciplinary techniques such as "I slap or spank him when he does something wrong" and "I make sure his punishments are unpleasant enough that he will remember them for a long time"	"I slap or spank him when he does something wrong" and "I make sure his punishments are unpleasant enough that he will remember them for a long time"	2	0.75	self-restraint	2	better self-restraint	0.87	392	0	-0.38	2	1	-0.40006	0.011236
228	Feldman, Wentzel	1990	Journal of Early Adolescence		USA	91	40	62	228		67	1	11.5	1.5	2.25	0	7 items from the Weinberger Parenting Inventory (Weinberger et al., 1989) were used to assess parents' use of authoritarian and punitive disciplinary techniques such as "I slap or spank him when he does something wrong" and "I make sure his punishments are unpleasant enough that he will remember them for a long time"		2	0.75	self-restraint	2	better self-restraint	0.87	395	0	-0.28	2	1	-0.287682	0.015625
239	Fosco, Grych	2012	Journal of Family Issues	0	USA	91	40	62	239		150	1	10	0	0	0	a single index created from child (Children's perceptions of interparental conflict questionnaire, Grych, Seid, & Finchman, 1992), mother & father (parents report on conflict and problem-solving scale, Kerig, 1996), and observed assessment (obsveration of marital communication, Lindahl & Malik, 2000)	poorer communication, including defensiveness, anger, and disrespect,	3	.87 for child, .90 for mothers, .91 for fathers, .91 for observed measure (intraclass r)	anger regulation, measuring the frequency, intesity and ability to appropriately manage and express angry feelings	1	more adaptive functioning (better sad regulation)	0.79	408	0	-0.22	2	1	-0.223656	0.00680272
274	Hallquist, Hipwell, Stepp	2015	Journal of Abnormal Psychology	0	USA	91	40	62	274		2228	1	10	0	0	0	caregiver and child reports on the Conflict Tactics Scale: Parent-Child version (CTSPC; Straus et al., 1998)	conflict tactics scale "mostly used scale for family violence"	3	average .74 (from .69 to .77)	poor self-control	3	poorer self-control	.77 for child report (from .74 to .80) and .82 for caregiver report (from .80 to .83)	427	100	-0.23	1	1	-0.234189	0.000449438
274	Hallquist, Hipwell, Stepp	2015	Journal of Abnormal Psychology		USA	91	40	62	274		2228	2	11	1	1	1	caregiver and child reports on the Conflict Tactics Scale: Parent-Child version (CTSPC; Straus et al., 1998)		3	average .74 (from .69 to .77)	poor self-control	3	poorer self-control	.77 for child report (from .74 to .80) and .82 for caregiver report (from .80 to .88)	428	100	-0.18	1	1	-0.181983	0.000449438
274	Hallquist, Hipwell, Stepp	2015	Journal of Abnormal Psychology		USA	91	40	62	274		2228	1	11	1	1	0	caregiver and child reports on the Conflict Tactics Scale: Parent-Child version (CTSPC; Straus et al., 1998)		3	average .74 (from .69 to .77)	poor self-control	3	poorer self-control	.77 for child report (from .74 to .80) and .82 for caregiver report (from .80 to .89)	429	100	-0.24	1	1	-0.244774	0.000449438
274	Hallquist, Hipwell, Stepp	2015	Journal of Abnormal Psychology		USA	91	40	62	274		2228	2	12	2	4	2	caregiver and child reports on the Conflict Tactics Scale: Parent-Child version (CTSPC; Straus et al., 1998)		3	average .74 (from .69 to .77)	poor self-control	3	poorer self-control	.77 for child report (from .74 to .80) and .82 for caregiver report (from .80 to .93)	430	100	-0.22	1	1	-0.223656	0.000449438
274	Hallquist, Hipwell, Stepp	2015	Journal of Abnormal Psychology		USA	91	40	62	274		2228	2	12	2	4	1	caregiver and child reports on the Conflict Tactics Scale: Parent-Child version (CTSPC; Straus et al., 1998)		3	average .74 (from .69 to .77)	poor self-control	3	poorer self-control	.77 for child report (from .74 to .80) and .82 for caregiver report (from .80 to .94)	431	100	-0.25	1	1	-0.255413	0.000449438
274	Hallquist, Hipwell, Stepp	2015	Journal of Abnormal Psychology		USA	91	40	62	274		2228	1	12	2	4	0	caregiver and child reports on the Conflict Tactics Scale: Parent-Child version (CTSPC; Straus et al., 1998)		3	average .74 (from .69 to .77)	poor self-control	3	poorer self-control	.77 for child report (from .74 to .80) and .82 for caregiver report (from .80 to .95)	432	100	-0.34	1	1	-0.354093	0.000449438
274	Hallquist, Hipwell, Stepp	2015	Journal of Abnormal Psychology		USA	91	40	62	274		2228	2	13	3	9	3	caregiver and child reports on the Conflict Tactics Scale: Parent-Child version (CTSPC; Straus et al., 1998)		3	average .74 (from .69 to .77)	poor self-control	3	poorer self-control	.77 for child report (from .74 to .80) and .82 for caregiver report (from .80 to .98)	433	100	-0.04	1	1	-0.0400214	0.000449438
274	Hallquist, Hipwell, Stepp	2015	Journal of Abnormal Psychology		USA	91	40	62	274		2228	2	13	3	9	2	caregiver and child reports on the Conflict Tactics Scale: Parent-Child version (CTSPC; Straus et al., 1998)		3	average .74 (from .69 to .77)	poor self-control	3	poorer self-control	.77 for child report (from .74 to .80) and .82 for caregiver report (from .80 to .99)	434	100	-0.08	1	1	-0.0801713	0.000449438
274	Hallquist, Hipwell, Stepp	2015	Journal of Abnormal Psychology		USA	91	40	62	274		2228	2	13	3	9	1	caregiver and child reports on the Conflict Tactics Scale: Parent-Child version (CTSPC; Straus et al., 1998)		3	average .74 (from .69 to .77)	poor self-control	3	poorer self-control	.77 for child report (from .74 to .80) and .82 for caregiver report (from .80 to .100)	435	100	-0.11	1	1	-0.110447	0.000449438
274	Hallquist, Hipwell, Stepp	2015	Journal of Abnormal Psychology		USA	91	40	62	274		2228	1	13	3	9	0	caregiver and child reports on the Conflict Tactics Scale: Parent-Child version (CTSPC; Straus et al., 1998)		3	average .74 (from .69 to .77)	poor self-control	3	poorer self-control	.77 for child report (from .74 to .80) and .82 for caregiver report (from .80 to .101)	436	100	-0.11	1	1	-0.110447	0.000449438
274	Hallquist, Hipwell, Stepp	2015	Journal of Abnormal Psychology		USA	91	40	62	274		2228	2	14	4	16	4	caregiver and child reports on the Conflict Tactics Scale: Parent-Child version (CTSPC; Straus et al., 1998)		3	average .74 (from .69 to .77)	poor self-control	3	poorer self-control	.77 for child report (from .74 to .80) and .82 for caregiver report (from .80 to .103)	437	100	-0.02	1	1	-0.0200027	0.000449438
274	Hallquist, Hipwell, Stepp	2015	Journal of Abnormal Psychology		USA	91	40	62	274		2228	2	14	4	16	3	caregiver and child reports on the Conflict Tactics Scale: Parent-Child version (CTSPC; Straus et al., 1998)		3	average .74 (from .69 to .77)	poor self-control	3	poorer self-control	.77 for child report (from .74 to .80) and .82 for caregiver report (from .80 to .104)	438	100	-0.02	1	1	-0.0200027	0.000449438
274	Hallquist, Hipwell, Stepp	2015	Journal of Abnormal Psychology		USA	91	40	62	274		2228	2	14	4	16	2	caregiver and child reports on the Conflict Tactics Scale: Parent-Child version (CTSPC; Straus et al., 1998)		3	average .74 (from .69 to .77)	poor self-control	3	poorer self-control	.77 for child report (from .74 to .80) and .82 for caregiver report (from .80 to .105)	439	100	-0.02	1	1	-0.0200027	0.000449438
274	Hallquist, Hipwell, Stepp	2015	Journal of Abnormal Psychology		USA	91	40	62	274		2228	2	14	4	16	1	caregiver and child reports on the Conflict Tactics Scale: Parent-Child version (CTSPC; Straus et al., 1998)		3	average .74 (from .69 to .77)	poor self-control	3	poorer self-control	.77 for child report (from .74 to .80) and .82 for caregiver report (from .80 to .106)	440	100	-0.02	1	1	-0.0200027	0.000449438
274	Hallquist, Hipwell, Stepp	2015	Journal of Abnormal Psychology		USA	91	40	62	274		2228	1	14	4	16	0	caregiver and child reports on the Conflict Tactics Scale: Parent-Child version (CTSPC; Straus et al., 1998)		3	average .74 (from .69 to .77)	poor self-control	3	poorer self-control	.77 for child report (from .74 to .80) and .82 for caregiver report (from .80 to .107)	441	100	-0.02	1	1	-0.0200027	0.000449438
345	Kim-Spoon, Farley, Holmes, et al.,	2014	Journal of Family Psychology	0	USA	91	40	62	1023	Youth Healthy Development (YHD) project	219	1	15.12	5.12	26.2144	0	The Conflict Tactics Scale (Straus, Hamby, Finkelhor, Moore, & Runyan, 1998)	conflict tactics scale "mostly used scale for family violence"	1	.76 and .79 for mother and father, respectively	self-control	3	greater self-control	0.83	572	64	-0.41	2	1	-0.435611	0.00462963
345	Kim-Spoon, Farley, Holmes, et al.,	2014	Journal of Family Psychology		USA	91	40	62	1023	Youth Healthy Development (YHD) project	219	1	15.12	5.12	26.2144	0	The Conflict Tactics Scale (Straus, Hamby, Finkelhor, Moore, & Runyan, 1998)		1	.90 and .51 for mother and father, respectively	self-control	3	greater self-control	0.83	573	64	-0.3	2	1	-0.30952	0.00462963
345	Kim-Spoon, Farley, Holmes, et al.,	2014	Journal of Family Psychology		USA	91	40	62	1023	Youth Healthy Development (YHD) project	219	1	15.12	5.12	26.2144	0	The Conflict Tactics Scale (Straus, Hamby, Finkelhor, Moore, & Runyan, 1998)		1	.75 and .51 for mother and father, respectiviely	self-control	3	greater self-control	0.83	574	64	-0.31	2	1	-0.320545	0.00462963
420	Loukas, Roalson, Herrera	2006	Journal of Early Adolescence	0	USA	91	40	62	420		380	1	11.69	1.69	2.8561	0	Conflict Behavior Questionnaire (Prinz, Foster, Kent, & O’Leary, 1979) by Metzler, Biglan, Ary, and Li (1998).	“I got my way by getting	1	0.61	effortful control	1	higher score more effortful control		687	52	-0.34	1	1	-0.354093	0.00265252
420	Loukas, Roalson, Herrera	2006	Journal of Early Adolescence		USA	91	40	62	420		79	1	11.69	1.69	2.8561	0	Conflict Behavior Questionnaire (Prinz, Foster, Kent, & O’Leary, 1979) by Metzler, Biglan, Ary, and Li (1998).	angry” and “One of us got so mad, we hit the other person.”	1	0.64	effortful control	1	higher score more effortful control		689	30	-0.19	1	1	-0.192337	0.0131579
466	Moilanen, Rasmussen, Padilla-Walker	2015	Journal of Research on Adolescence		USA	91	40	62	1007	Flourishing Families Project	473	1	13.32	3.32	11.0224	0	the Parenting Style and Dimensions Questionnaire-Short version	Coercion	1	.66 to .77	wave 3 behavioral self-regulation	2	more behavioral sr	.76 to .79	733	51	-0.15	2	1	-0.15114	0.00212766
466	Moilanen, Rasmussen, Padilla-Walker	2015	Journal of Research on Adolescence		USA	91	40	62	1007	Flourishing Families Project	473	1	13.32	3.32	11.0224	0	the Parenting Style and Dimensions Questionnaire-Short version	Coercion	1	.66 to .77	wave 3 emotional self-regulation	2	more emotional sr	.88 to .89	736	51	-0.22	2	1	-0.223656	0.00212766
466	Moilanen, Rasmussen, Padilla-Walker	2015	Journal of Research on Adolescence		USA	91	40	62	1007	Flourishing Families Project	473	1	13.32	3.32	11.0224	0	the Parenting Style and Dimensions Questionnaire-Short version	Coercion	1	.66 to .77	wave 3 cognitive self-regulation	2	more cognitive sr	.81 to .82	739	51	-0.18	2	1	-0.181983	0.00212766
466	Moilanen, Rasmussen, Padilla-Walker	2015	Journal of Research on Adolescence		USA	91	40	62	1007	Flourishing Families Project	473	2	14.29	4.29	18.4041	0.97	the Parenting Style and Dimensions Questionnaire-Short version	Coercion	1	.66 to .77	wave 4 behavioral self-regulation	2	more behavioral sr	.76 to .79	754	51	-0.1	2	1	-0.100335	0.00212766
466	Moilanen, Rasmussen, Padilla-Walker	2015	Journal of Research on Adolescence		USA	91	40	62	1007	Flourishing Families Project	473	2	14.29	4.29	18.4041	0.97	the Parenting Style and Dimensions Questionnaire-Short version	Coercion	1	.66 to .77	wave 4 emotional self-regulation	2	more emotional sr	.88 to .89	757	51	-0.23	2	1	-0.234189	0.00212766
466	Moilanen, Rasmussen, Padilla-Walker	2015	Journal of Research on Adolescence		USA	91	40	62	1007	Flourishing Families Project	473	2	14.29	4.29	18.4041	0.97	the Parenting Style and Dimensions Questionnaire-Short version	Coercion	1	.66 to .77	wave 4 cognitive self-regulation	2	more cognitive sr	.81 to .82	760	51	-0.22	2	1	-0.223656	0.00212766
466	Moilanen, Rasmussen, Padilla-Walker	2015	Journal of Research on Adolescence	0	USA	91	40	62	1007	Flourishing Families Project	473	1	14.29	4.29	18.4041	0	the Parenting Style and Dimensions Questionnaire-Short version	physical coercion (4 items, e.g., “My parent slaps me when I misbe- have”), verbal hostility (4 items, e.g., “My parent yells or shouts when I misbehave”) and punish- ment (4 items, e.g., “My parent punishes me by taking away privileges with little if any explana- tion.”)	1	.66 to .77	wave 4 behavioral self-regulation	2	more behavioral sr	.76 to .79	774	51	-0.15	2	1	-0.15114	0.00212766
466	Moilanen, Rasmussen, Padilla-Walker	2015	Journal of Research on Adolescence		USA	91	40	62	1007	Flourishing Families Project	473	1	14.29	4.29	18.4041	0	the Parenting Style and Dimensions Questionnaire-Short version	Coercion	1	.66 to .77	wave 4 behavioral self-regulation	2	more behavioral sr	.76 to .79	775	51	-0.13	2	1	-0.13074	0.00212766
466	Moilanen, Rasmussen, Padilla-Walker	2015	Journal of Research on Adolescence		USA	91	40	62	1007	Flourishing Families Project	473	1	14.29	4.29	18.4041	0	the Parenting Style and Dimensions Questionnaire-Short version		1	.66 to .77	wave 4 emotional self-regulation	2	more emotional sr	.88 to .89	777	51	-0.26	2	1	-0.266108	0.00212766
466	Moilanen, Rasmussen, Padilla-Walker	2015	Journal of Research on Adolescence		USA	91	40	62	1007	Flourishing Families Project	473	1	14.29	4.29	18.4041	0	the Parenting Style and Dimensions Questionnaire-Short version	Coercion	1	.66 to .77	wave 4 emotional self-regulation	2	more emotional sr	.88 to .89	778	51	-0.23	2	1	-0.234189	0.00212766
466	Moilanen, Rasmussen, Padilla-Walker	2015	Journal of Research on Adolescence		USA	91	40	62	1007	Flourishing Families Project	473	1	14.29	4.29	18.4041	0	the Parenting Style and Dimensions Questionnaire-Short version		1	.66 to .77	wave 4 cognitive self-regulation	2	more cognitive sr	.81 to .82	780	51	-0.2	2	1	-0.202733	0.00212766
466	Moilanen, Rasmussen, Padilla-Walker	2015	Journal of Research on Adolescence		USA	91	40	62	1007	Flourishing Families Project	473	1	14.29	4.29	18.4041	0	the Parenting Style and Dimensions Questionnaire-Short version	Coercion	1	.66 to .77	wave 4 cognitive self-regulation	2	more cognitive sr	.81 to .82	781	51	-0.24	2	1	-0.244774	0.00212766
466	Moilanen, Rasmussen, Padilla-Walker	2015	Journal of Research on Adolescence		USA	91	40	62	1007	Flourishing Families Project	473	1	14.29	4.29	18.4041	0	the Parenting Style and Dimensions Questionnaire-Short version	Coercion	1	.69 to .80	wave 3 behavioral self-regulation	2	more behavioral sr	.76 to .79	796	51	-0.13	2	1	-0.13074	0.00212766
466	Moilanen, Rasmussen, Padilla-Walker	2015	Journal of Research on Adolescence		USA	91	40	62	1007	Flourishing Families Project	473	1	14.29	4.29	18.4041	0	the Parenting Style and Dimensions Questionnaire-Short version	Coercion	1	.69 to .80	wave 3 emotional self-regulation	2	more emotional sr	.88 to .89	799	51	-0.12	2	1	-0.120581	0.00212766
466	Moilanen, Rasmussen, Padilla-Walker	2015	Journal of Research on Adolescence		USA	91	40	62	1007	Flourishing Families Project	473	1	14.29	4.29	18.4041	0	the Parenting Style and Dimensions Questionnaire-Short version	Coercion	1	.69 to .80	wave 3 cognitive self-regulation	2	more cognitive sr	.81 to .82	802	51	-0.21	2	1	-0.213171	0.00212766
466	Moilanen, Rasmussen, Padilla-Walker	2015	Journal of Research on Adolescence		USA	91	40	62	1007	Flourishing Families Project	473	2	14.29	4.29	18.4041	0.97	the Parenting Style and Dimensions Questionnaire-Short version	Coercion	1	.69 to .80	wave 4 behavioral self-regulation	2	more behavioral sr	.76 to .79	817	51	-0.13	2	1	-0.13074	0.00212766
466	Moilanen, Rasmussen, Padilla-Walker	2015	Journal of Research on Adolescence		USA	91	40	62	1007	Flourishing Families Project	473	2	14.29	4.29	18.4041	0.97	the Parenting Style and Dimensions Questionnaire-Short version	Coercion	1	.69 to .80	wave 4 emotional self-regulation	2	more emotional sr	.88 to .89	820	51	-0.11	2	1	-0.110447	0.00212766
466	Moilanen, Rasmussen, Padilla-Walker	2015	Journal of Research on Adolescence		USA	91	40	62	1007	Flourishing Families Project	473	2	14.29	4.29	18.4041	0.97	the Parenting Style and Dimensions Questionnaire-Short version	Coercion	1	.69 to .80	wave 4 cognitive self-regulation	2	more cognitive sr	.81 to .82	823	51	-0.2	2	1	-0.202733	0.00212766
466	Moilanen, Rasmussen, Padilla-Walker	2015	Journal of Research on Adolescence		USA	91	40	62	1007	Flourishing Families Project	473	1	14.29	4.29	18.4041	0	the Parenting Style and Dimensions Questionnaire-Short version		1	.69 to .80	wave 4 behavioral self-regulation	2	more behavioral sr	.76 to .79	837	51	-0.07	2	1	-0.0701147	0.00212766
466	Moilanen, Rasmussen, Padilla-Walker	2015	Journal of Research on Adolescence		USA	91	40	62	1007	Flourishing Families Project	473	1	14.29	4.29	18.4041	0	the Parenting Style and Dimensions Questionnaire-Short version	Coercion	1	.69 to .80	wave 4 behavioral self-regulation	2	more behavioral sr	.76 to .79	838	51	-0.11	2	1	-0.110447	0.00212766
466	Moilanen, Rasmussen, Padilla-Walker	2015	Journal of Research on Adolescence		USA	91	40	62	1007	Flourishing Families Project	473	1	14.29	4.29	18.4041	0	the Parenting Style and Dimensions Questionnaire-Short version		1	.69 to .80	wave 4 emotional self-regulation	2	more emotional sr	.88 to .89	840	51	-0.2	2	1	-0.202733	0.00212766
466	Moilanen, Rasmussen, Padilla-Walker	2015	Journal of Research on Adolescence		USA	91	40	62	1007	Flourishing Families Project	473	1	14.29	4.29	18.4041	0	the Parenting Style and Dimensions Questionnaire-Short version	Coercion	1	.69 to .80	wave 4 emotional self-regulation	2	more emotional sr	.88 to .89	841	51	-0.11	2	1	-0.110447	0.00212766
466	Moilanen, Rasmussen, Padilla-Walker	2015	Journal of Research on Adolescence		USA	91	40	62	1007	Flourishing Families Project	473	1	14.29	4.29	18.4041	0	the Parenting Style and Dimensions Questionnaire-Short version		1	.69 to .80	wave 4 cognitive self-regulation	2	more cognitive sr	.81 to .82	843	51	-0.08	2	1	-0.0801713	0.00212766
466	Moilanen, Rasmussen, Padilla-Walker	2015	Journal of Research on Adolescence		USA	91	40	62	1007	Flourishing Families Project	473	1	14.29	4.29	18.4041	0	the Parenting Style and Dimensions Questionnaire-Short version	Coercion	1	.69 to .80	wave 4 cognitive self-regulation	2	more cognitive sr	.81 to .82	844	51	-0.12	2	1	-0.120581	0.00212766
473	Moon, Morash & McCluskey	2012	Crime & Delinquency	0	South-Korea	18	60	39	473		2817	1	12	2	4	0	extent of physical and verbal arguments/fights between parents and being verbally and/or physical punished by parents	extent of physical and verbal arguments/fights between parents and being verbally and/or physical punished by parents	1	0.82	low self-control	1	higher scores lower self-control	0.63	903	50	-0.22	1	1	-0.223656	0.000355366
569	Rowe , Zimmer-Gembeck & Hood	2016	Journal of Adolescence	0	Australia	90	36	61	1010	Longitudinal Study of Australian Children (LSAC)	3797	1	10.3	0.3	0.09	0	‘How often are you angry when you punish the study child?’	‘How often are you angry when you punish the study child?’	2	0.69	persistence	2	more persistence	0.82	1077	49	-0.36	1	1	-0.376886	0.000263574
569	Rowe , Zimmer-Gembeck & Hood	2016	Journal of Adolescence		Australia	90	36	61	1010	Longitudinal Study of Australian Children (LSAC)	3797	1	10.3	0.3	0.09	0	‘How often do people in your family yell at each other’,		1		persistence	2	more persistence	0.82	1078	49	-0.13	2	1	-0.13074	0.000263574
584	Schwarz, Stutz, Ledermann	2012	Journal of Youth and Adolescence	0	Switzerland	68	34	70	584		180	2	11.61	1.61	2.5921	1	the Childrens's Perception of the Interparental Conflict Scale (CPIC; Grych et al., 1992)		1	0.72	adaptive emotion regulation of anger (distraction)	1	more use of distraction	0.91	1093	51	-0.15	1	1	-0.15114	0.00564972
584	Schwarz, Stutz, Ledermann	2012	Journal of Youth and Adolescence		Switzerland	68	34	70	584		180	2	11.61	1.61	2.5921	1	the Childrens's Perception of the Interparental Conflict Scale (CPIC; Grych et al., 1992)		1	0.74	adaptive emotion regulation of anger (distraction)	1	more use of distraction	0.91	1094	51	-0.16	1	1	-0.161387	0.00564972
584	Schwarz, Stutz, Ledermann	2012	Journal of Youth and Adolescence		Switzerland	68	34	70	584		180	2	11.61	1.61	2.5921	1	the Childrens's Perception of the Interparental Conflict Scale (CPIC; Grych et al., 1992)		1	0.61	adaptive emotion regulation of anger (distraction)	1	more use of distraction	0.91	1095	51	-0.08	1	1	-0.0801713	0.00564972
584	Schwarz, Stutz, Ledermann	2012	Journal of Youth and Adolescence		Switzerland	68	34	70	584		180	2	11.61	1.61	2.5921	1	the Childrens's Perception of the Interparental Conflict Scale (CPIC; Grych et al., 1992)		1	0.72	adaptive emotion regulation of anger (mood enhancement)	1	more use of mood enhancement	0.91	1100	51	-0.12	1	1	-0.120581	0.00564972
584	Schwarz, Stutz, Ledermann	2012	Journal of Youth and Adolescence		Switzerland	68	34	70	584		180	2	11.61	1.61	2.5921	1	the Childrens's Perception of the Interparental Conflict Scale (CPIC; Grych et al., 1992)		1	0.74	adaptive emotion regulation of anger (mood enhancement)	1	more use of mood enhancement	0.91	1101	51	-0.19	1	1	-0.192337	0.00564972
584	Schwarz, Stutz, Ledermann	2012	Journal of Youth and Adolescence		Switzerland	68	34	70	584		180	2	11.61	1.61	2.5921	1	the Childrens's Perception of the Interparental Conflict Scale (CPIC; Grych et al., 1992)		1	0.61	adaptive emotion regulation of anger (mood enhancement)	1	more use of mood enhancement	0.91	1102	51	-0.05	1	1	-0.0500417	0.00564972
584	Schwarz, Stutz, Ledermann	2012	Journal of Youth and Adolescence		Switzerland	68	34	70	584		180	2	11.61	1.61	2.5921	1	the Childrens's Perception of the Interparental Conflict Scale (CPIC; Grych et al., 1992)		1	0.72	adaptive emotion regulation of anger (acceptance)	1	more use of acceptance	0.91	1107	51	-0.1	1	1	-0.100335	0.00564972
584	Schwarz, Stutz, Ledermann	2012	Journal of Youth and Adolescence		Switzerland	68	34	70	584		180	2	11.61	1.61	2.5921	1	the Childrens's Perception of the Interparental Conflict Scale (CPIC; Grych et al., 1992)		1	0.74	adaptive emotion regulation of anger (acceptance)	1	more use of acceptance	0.91	1108	51	-0.26	1	1	-0.266108	0.00564972
584	Schwarz, Stutz, Ledermann	2012	Journal of Youth and Adolescence		Switzerland	68	34	70	584		180	2	11.61	1.61	2.5921	1	the Childrens's Perception of the Interparental Conflict Scale (CPIC; Grych et al., 1992)		1	0.61	adaptive emotion regulation of anger (acceptance)	1	more use of acceptance	0.91	1109	51	-0.13	1	1	-0.13074	0.00564972
584	Schwarz, Stutz, Ledermann	2012	Journal of Youth and Adolescence		Switzerland	68	34	70	584		180	2	11.61	1.61	2.5921	1	the Childrens's Perception of the Interparental Conflict Scale (CPIC; Grych et al., 1992)		1	0.72	adaptive emotion regulation of anger (oblivion)	1	more use of oblivion	0.91	1114	51	-0.17	1	1	-0.171667	0.00564972
584	Schwarz, Stutz, Ledermann	2012	Journal of Youth and Adolescence		Switzerland	68	34	70	584		180	2	11.61	1.61	2.5921	1	the Childrens's Perception of the Interparental Conflict Scale (CPIC; Grych et al., 1992)		1	0.74	adaptive emotion regulation of anger (oblivion)	1	more use of oblivion	0.91	1115	51	-0.2	1	1	-0.202733	0.00564972
584	Schwarz, Stutz, Ledermann	2012	Journal of Youth and Adolescence		Switzerland	68	34	70	584		180	2	11.61	1.61	2.5921	1	the Childrens's Perception of the Interparental Conflict Scale (CPIC; Grych et al., 1992)		1	0.61	adaptive emotion regulation of anger (oblivion)	1	more use of oblivion	0.91	1116	51	-0.1	1	1	-0.100335	0.00564972
584	Schwarz, Stutz, Ledermann	2012	Journal of Youth and Adolescence		Switzerland	68	34	70	584		180	2	11.61	1.61	2.5921	1	the Childrens's Perception of the Interparental Conflict Scale (CPIC; Grych et al., 1992)		1	0.72	adaptive emotion regulation of anger (cognitive problem solving)	1	more use of cognitive problem solving	0.91	1121	51	-0.24	1	1	-0.244774	0.00564972
584	Schwarz, Stutz, Ledermann	2012	Journal of Youth and Adolescence		Switzerland	68	34	70	584		180	2	11.61	1.61	2.5921	1	the Childrens's Perception of the Interparental Conflict Scale (CPIC; Grych et al., 1992)		1	0.74	adaptive emotion regulation of anger (cognitive problem solving)	1	more use of cognitive problem solving	0.91	1122	51	-0.21	1	1	-0.213171	0.00564972
584	Schwarz, Stutz, Ledermann	2012	Journal of Youth and Adolescence		Switzerland	68	34	70	584		180	2	11.61	1.61	2.5921	1	the Childrens's Perception of the Interparental Conflict Scale (CPIC; Grych et al., 1992)		1	0.61	adaptive emotion regulation of anger (cognitive problem solving)	1	more use of cognitive problem solving	0.91	1123	51	-0.22	1	1	-0.223656	0.00564972
584	Schwarz, Stutz, Ledermann	2012	Journal of Youth and Adolescence		Switzerland	68	34	70	584		180	2	11.61	1.61	2.5921	1	the Childrens's Perception of the Interparental Conflict Scale (CPIC; Grych et al., 1992)		1	0.72	adaptive emotion regulation of anger (reevaluation)	1	more use of reevaluation	0.91	1128	51	-0.16	1	1	-0.161387	0.00564972
584	Schwarz, Stutz, Ledermann	2012	Journal of Youth and Adolescence		Switzerland	68	34	70	584		180	2	11.61	1.61	2.5921	1	the Childrens's Perception of the Interparental Conflict Scale (CPIC; Grych et al., 1992)		1	0.74	adaptive emotion regulation of anger (reevaluation)	1	more use of reevaluation	0.91	1129	51	-0.2	1	1	-0.202733	0.00564972
584	Schwarz, Stutz, Ledermann	2012	Journal of Youth and Adolescence		Switzerland	68	34	70	584		180	2	11.61	1.61	2.5921	1	the Childrens's Perception of the Interparental Conflict Scale (CPIC; Grych et al., 1992)		1	0.61	adaptive emotion regulation of anger (reevaluation)	1	more use of reevaluation	0.91	1130	51	-0.17	1	1	-0.171667	0.00564972
594	Shin, Cook, Morris et al	2016	Preventive Medicine	0	USA	91	40	62	594		333	1	21.7	11.7	136.89	0	Childhood maltreatment was assessed using a computer assisted self-interviewing (CASI) method of the Childhood Trauma Question- naire (CTQ) (Bernstein et al., 1994; Bernstein and Fink, 1998).	Childhood Trauma Question- naire (CTQ)	1	0.89	Lack of urgency	1	Higher UPPS scale scores indicate a more impul- sive personality.	0.89	1167	52	-0.4	1	1	-0.423649	0.0030303
594	Shin, Cook, Morris et al	2016	Preventive Medicine		USA	91	40	62	594		333	1	21.7	11.7	136.89	0	Childhood maltreatment was assessed using a computer assisted self-interviewing (CASI) method of the Childhood Trauma Question- naire (CTQ) (Bernstein et al., 1994; Bernstein and Fink, 1998).		1	0.89	lack of premeditation	1	Higher UPPS scale scores indicate a more impul- sive personality.	0.92	1168	52	-0.11	1	1	-0.110447	0.0030303
594	Shin, Cook, Morris et al	2016	Preventive Medicine		USA	91	40	62	594		333	1	21.7	11.7	136.89	0	Childhood maltreatment was assessed using a computer assisted self-interviewing (CASI) method of the Childhood Trauma Question- naire (CTQ) (Bernstein et al., 1994; Bernstein and Fink, 1998).		1	0.89	lack of perseverence	1	Higher UPPS scale scores indicate a more impul- sive personality.	0.72	1169	52	-0.13	1	1	-0.13074	0.0030303
594	Shin, Cook, Morris et al	2016	Preventive Medicine		USA	91	40	62	594		333	1	21.7	11.7	136.89	0	Childhood maltreatment was assessed using a computer assisted self-interviewing (CASI) method of the Childhood Trauma Question- naire (CTQ) (Bernstein et al., 1994; Bernstein and Fink, 1998).		1	0.89	sensation seeking	1	Higher UPPS scale scores indicate a more impul- sive personality.	0.9	1170	52	-0.01	1	1	-0.0100003	0.0030303
594	Shin, Cook, Morris et al	2016	Preventive Medicine		USA	91	40	62	594		333	1	21.7	11.7	136.89	0	Childhood maltreatment was assessed using a computer assisted self-interviewing (CASI) method of the Childhood Trauma Question- naire (CTQ) (Bernstein et al., 1994; Bernstein and Fink, 1998).		1	0.86	Lack of urgency	1	Higher UPPS scale scores indicate a more impul- sive personality.	0.89	1171	52	-0.19	1	1	-0.192337	0.0030303
594	Shin, Cook, Morris et al	2016	Preventive Medicine		USA	91	40	62	594		333	1	21.7	11.7	136.89	0	Childhood maltreatment was assessed using a computer assisted self-interviewing (CASI) method of the Childhood Trauma Question- naire (CTQ) (Bernstein et al., 1994; Bernstein and Fink, 1998).		1	0.86	lack of premeditation	1	Higher UPPS scale scores indicate a more impul- sive personality.	0.92	1172	52	-0.06	1	1	-0.0600722	0.0030303
594	Shin, Cook, Morris et al	2016	Preventive Medicine		USA	91	40	62	594		333	1	21.7	11.7	136.89	0	Childhood maltreatment was assessed using a computer assisted self-interviewing (CASI) method of the Childhood Trauma Question- naire (CTQ) (Bernstein et al., 1994; Bernstein and Fink, 1998).		1	0.86	lack of perseverence	1	Higher UPPS scale scores indicate a more impul- sive personality.	0.72	1173	52	-0.01	1	1	-0.0100003	0.0030303
594	Shin, Cook, Morris et al	2016	Preventive Medicine		USA	91	40	62	594		333	1	21.7	11.7	136.89	0	Childhood maltreatment was assessed using a computer assisted self-interviewing (CASI) method of the Childhood Trauma Question- naire (CTQ) (Bernstein et al., 1994; Bernstein and Fink, 1998).		1	0.86	sensation seeking	1	Higher UPPS scale scores indicate a more impul- sive personality.	0.9	1174	52	-0.08	1	1	-0.0801713	0.0030303
603	Simons, Simons, Chen, et al.	2007	Criminology	0	USA	91	40	62	603		673	1	12.5	2.5	6.25	0	3 items completed by caregiver and 14 items reported by the child	How often do you hit your child with a belt or paddle? How often do you lose your temper and yell at your child?) and a 14-item scale completed by the target child (How often does your parent push, grab, hit, or shove you? How often does your par- ent shout or yell at you?)	3	.70 for both waves and .79 for composite	low self-control	1	lower sc	.77 at T1 and .81 at T2	1180	54	-0.16	2	1	-0.161387	0.00149254
605	Simons, Simons,Landor, et al.	2014	Journal of Family Psychology	1	USA	91	40	62	1017	the Family andCommunity Health Study (FACHS)	345	2	18	8	64	3	14 items to assess the construct (e.g., how often during the preceeding year the primary caregiver engaged in various harsh parenting practices		1	.71 to .82	self-control	1	more sc	0.7	1183	59	-0.2	1	1	-0.202733	0.00292398
606	Simons, Sutton, Simons et al	2016	Journal of Youth and Adolescence	1	USA	91	40	62	1017	the Family andCommunity Health Study (FACHS)	351	1	12.5	2.5	6.25	0	youth reported on harsh, hostile parenting practices displayed by their PC		1	0.7	self-control	1	higher scores more sc	0.76	1186	100	-0.08	1	1	-0.0801713	0.00287356
606	Simons, Sutton, Simons et al	2016	Journal of Youth and Adolescence		USA	91	40	62	1017	the Family andCommunity Health Study (FACHS)	278	1	12.5	2.5	6.25	0	youth reported on harsh, hostile parenting practices displayed by their PC		1	0.7	self-control	1	higher scores more sc	0.8	1189	0	-0.23	1	1	-0.234189	0.00363636
655	Unnever, Cullen & Agnew	2006	Youth Violence and Juvenile Justice	0	USA	91	40	62	655		2395	1	12.4	2.4	5.76	0	items including questions like How often have your parents/guardians argued heatedly or shouted at each other? How often have your parents/guardians ended up threatening each other?	How often have your parents/guardians argued heatedly or shouted at each other?	1	0.77	low self-control	1	lower self-control	0.87	1269	51	-0.25	1	1	-0.255413	0.00041806
655	Unnever, Cullen & Agnew	2006	Youth Violence and Juvenile Justice		USA	91	40	62	655		2395	1	12.4	2.4	5.76	0	Coercive parenting (Simon,s Wu et al. 1994) the degree to which the respondent’s parents or guardians used authoritarian parenting techniques such as yelling and hitting	Coercion	1	0.72	low self-control	1	lower self-control	0.87	1272	51	-0.31	1	1	-0.320545	0.00041806
686	Wang, Brinkworth, Eccles	2013	Developmental Psychology	0	USA	91	40	62	686		1479	1	12.9	2.9	8.41	0	items adapted from the Family Management Study (Furstenberg et al., 1999)	“How often do you shout or yell at your child?” “How often do you criticize your child’s ideas?” “How often do you and your child have disagreements or arguments about how she/he spends time outside of school?”	2	0.89	effortful control	1	higher effortful control	0.82	1328	52	-0.21	2	1	-0.213171	0.000677507
760	Eisenberg, Hofer, Spinrad, et al.	2008	Monographs of the Society for Research in Child Development	0	USA	91	40	62	760		64	1	13	3	9	0	the conflictual interaction, postconflict reports	the hostility refers to open hostility, sarcasm, put-down, or mocking	3		combination of ego control and effortful control	2	greater control/regulation	> .78 (across subscales), no alpha for final composite score	1421	100	-0.12	2	1	-0.120581	0.0163934
760	Eisenberg, Hofer, Spinrad, et al.	2008	Monographs of the Society for Research in Child Development		USA	91	40	62	760		64	1	13	3	9	0	the conflictual interaction, postconflict reports		3		combination of ego control and effortful control	2	greater control/regulation	> .78 (across subscales), no alpha for final composite score	1422	100	-0.38	2	1	-0.40006	0.0163934
760	Eisenberg, Hofer, Spinrad, et al.	2008	Monographs of the Society for Research in Child Development		USA	91	40	62	760		64	1	13	3	9	0	the conflictual interaction, postconflict reports		3		combination of ego control and effortful control	2	greater control/regulation	> .78 (across subscales), no alpha for final composite score	1423	100	-0.56	2	1	-0.632833	0.0163934
760	Eisenberg, Hofer, Spinrad, et al.	2008	Monographs of the Society for Research in Child Development		USA	91	40	62	760		64	1	13	3	9	0	the conflictual interaction, postconflict reports		3		combination of ego control and effortful control	2	greater control/regulation	> .78 (across subscales), no alpha for final composite score	1424	100	-0.24	2	1	-0.244774	0.0163934
760	Eisenberg, Hofer, Spinrad, et al.	2008	Monographs of the Society for Research in Child Development		USA	91	40	62	760		64	1	13	3	9	0	the conflictual interaction, postconflict reports		3		combination of ego control and effortful control	2	greater control/regulation	> .78 (across subscales), no alpha for final composite score	1425	100	-0.19	2	1	-0.192337	0.0163934
760	Eisenberg, Hofer, Spinrad, et al.	2008	Monographs of the Society for Research in Child Development		USA	91	40	62	760		64	1	13	3	9	0	the conflictual interaction, postconflict reports		3		combination of ego control and effortful control	2	greater control/regulation	> .78 (across subscales), no alpha for final composite score	1426	100	-0.41	2	1	-0.435611	0.0163934
760	Eisenberg, Hofer, Spinrad, et al.	2008	Monographs of the Society for Research in Child Development		USA	91	40	62	760		64	1	13	3	9	0	the conflictual interaction, postconflict reports		3		combination of ego control and effortful control	2	greater control/regulation	> .78 (across subscales), no alpha for final composite score	1427	100	-0.24	2	1	-0.244774	0.0163934
760	Eisenberg, Hofer, Spinrad, et al.	2008	Monographs of the Society for Research in Child Development		USA	91	40	62	760		64	1	13	3	9	0	the conflictual interaction, postconflict reports		3		combination of ego control and effortful control	2	greater control/regulation	> .78 (across subscales), no alpha for final composite score	1428	100	0	2	1	0	0.0163934
760	Eisenberg, Hofer, Spinrad, et al.	2008	Monographs of the Society for Research in Child Development		USA	91	40	62	760		64	1	13	3	9	0	the conflictual interaction, postconflict reports		3		combination of ego control and effortful control		greater control/regulation	.99 for interrater reliability	1429	100	-0.01	2	1	-0.0100003	0.0163934
760	Eisenberg, Hofer, Spinrad, et al.	2008	Monographs of the Society for Research in Child Development		USA	91	40	62	760		64	1	13	3	9	0	the conflictual interaction, postconflict reports		3		combination of ego control and effortful control		greater control/regulation	.99 for interrater reliability	1430	100	0.11	2	1	0.110447	0.0163934
760	Eisenberg, Hofer, Spinrad, et al.	2008	Monographs of the Society for Research in Child Development		USA	91	40	62	760		64	1	13	3	9	0	the conflictual interaction, postconflict reports		3		combination of ego control and effortful control		greater control/regulation	.99 for interrater reliability	1431	100	0.03	2	1	0.030009	0.0163934
760	Eisenberg, Hofer, Spinrad, et al.	2008	Monographs of the Society for Research in Child Development		USA	91	40	62	760		64	1	13	3	9	0	the conflictual interaction, postconflict reports		3		combination of ego control and effortful control		greater control/regulation	.99 for interrater reliability	1432	100	0.11	2	1	0.110447	0.0163934
760	Eisenberg, Hofer, Spinrad, et al.	2008	Monographs of the Society for Research in Child Development		USA	91	40	62	760		62	1	13	3	9	0	the conflictual interaction, postconflict reports		3		combination of ego control and effortful control	2	greater control/regulation	> .78 (across subscales), no alpha for final composite score	1450	0	-0.11	2	1	-0.110447	0.0169492
760	Eisenberg, Hofer, Spinrad, et al.	2008	Monographs of the Society for Research in Child Development		USA	91	40	62	760		62	1	13	3	9	0	the conflictual interaction, postconflict reports		3		combination of ego control and effortful control	2	greater control/regulation	> .78 (across subscales), no alpha for final composite score	1451	0	-0.05	2	1	-0.0500417	0.0169492
760	Eisenberg, Hofer, Spinrad, et al.	2008	Monographs of the Society for Research in Child Development		USA	91	40	62	760		62	1	13	3	9	0	the conflictual interaction, postconflict reports		3		combination of ego control and effortful control	2	greater control/regulation	> .78 (across subscales), no alpha for final composite score	1452	0	-0.16	2	1	-0.161387	0.0169492
760	Eisenberg, Hofer, Spinrad, et al.	2008	Monographs of the Society for Research in Child Development		USA	91	40	62	760		62	1	13	3	9	0	the conflictual interaction, postconflict reports		3		combination of ego control and effortful control	2	greater control/regulation	> .78 (across subscales), no alpha for final composite score	1453	0	-0.1	2	1	-0.100335	0.0169492
760	Eisenberg, Hofer, Spinrad, et al.	2008	Monographs of the Society for Research in Child Development		USA	91	40	62	760		62	1	13	3	9	0	the conflictual interaction, postconflict reports		3		combination of ego control and effortful control	2	greater control/regulation	> .78 (across subscales), no alpha for final composite score	1454	0	-0.1	2	1	-0.100335	0.0169492
760	Eisenberg, Hofer, Spinrad, et al.	2008	Monographs of the Society for Research in Child Development		USA	91	40	62	760		62	1	13	3	9	0	the conflictual interaction, postconflict reports		3		combination of ego control and effortful control	2	greater control/regulation	> .78 (across subscales), no alpha for final composite score	1455	0	-0.04	2	1	-0.0400214	0.0169492
760	Eisenberg, Hofer, Spinrad, et al.	2008	Monographs of the Society for Research in Child Development		USA	91	40	62	760		62	1	13	3	9	0	the conflictual interaction, postconflict reports		3		combination of ego control and effortful control	2	greater control/regulation	> .78 (across subscales), no alpha for final composite score	1456	0	-0.13	2	1	-0.13074	0.0169492
760	Eisenberg, Hofer, Spinrad, et al.	2008	Monographs of the Society for Research in Child Development		USA	91	40	62	760		62	1	13	3	9	0	the conflictual interaction, postconflict reports		3		combination of ego control and effortful control	2	greater control/regulation	> .78 (across subscales), no alpha for final composite score	1457	0	-0.14	2	1	-0.140926	0.0169492
760	Eisenberg, Hofer, Spinrad, et al.	2008	Monographs of the Society for Research in Child Development		USA	91	40	62	760		62	1	13	3	9	0	the conflictual interaction, postconflict reports		3		combination of ego control and effortful control		greater control/regulation	.99 for interrater reliability	1458	0	-0.12	2	1	-0.120581	0.0169492
760	Eisenberg, Hofer, Spinrad, et al.	2008	Monographs of the Society for Research in Child Development		USA	91	40	62	760		62	1	13	3	9	0	the conflictual interaction, postconflict reports		3		combination of ego control and effortful control		greater control/regulation	.99 for interrater reliability	1459	0	-0.1	2	1	-0.100335	0.0169492
760	Eisenberg, Hofer, Spinrad, et al.	2008	Monographs of the Society for Research in Child Development		USA	91	40	62	760		62	1	13	3	9	0	the conflictual interaction, postconflict reports		3		combination of ego control and effortful control		greater control/regulation	.99 for interrater reliability	1460	0	-0.2	2	1	-0.202733	0.0169492
760	Eisenberg, Hofer, Spinrad, et al.	2008	Monographs of the Society for Research in Child Development		USA	91	40	62	760		62	1	13	3	9	0	the conflictual interaction, postconflict reports		3		combination of ego control and effortful control		greater control/regulation	.99 for interrater reliability	1461	0	0.04	2	1	0.0400214	0.0169492
763	Fosco, Caruthers, Dishion	2012	Journal of Family Psychology		USA	91	40	62	763		792	1	17	7	49	0	The Family Conflcit Scale (Child & Family Center, 2001a, 2001b)		1	0.75	effortful control	1	higher ec	.72 to .83	1465	49	-0.25	1	1	-0.255413	0.00126743
763	Fosco, Caruthers, Dishion	2012	Journal of Family Psychology	0	USA	91	40	62	763		792	1	17	7	49	0	The Family Conflcit Scale (Child & Family Center, 2001a, 2001b)	poorer communication, including defensiveness, anger, and disrespect,	2	0.74	effortful control	1	higher ec	.72 to .83	1466	49	-0.08	2	1	-0.0801713	0.00126743
763	Fosco, Caruthers, Dishion	2012	Journal of Family Psychology		USA	91	40	62	763		792	1	17	7	49	0	The Family Conflcit Scale (Child & Family Center, 2001a, 2001b)		2	0.68	effortful control	1	higher ec	.72 to .83	1467	49	-0.11	2	1	-0.110447	0.00126743
788	Park & Kim	2012	JOURNAL OF CLINICAL PSYCHOLOGY	0	USA	91	40	62	1005	cross-sectional study on Korean American Youths	166	1	13	3	9	0	Asian American Family Conflicts Scale (FCS; Lee, Choe, Kim, & Ngo, 2000)	the intensity of conﬂict between adolescents and their mothers and fathers, respectively	1	0.96	anger control	1	better anger control	0.87	1504	55	-0.08	1	1	-0.0801713	0.00613497
789	Patouris, Scaife & Nobes	2016	Journal of Substance Use	0	UK	89	35	66	789		199	1	16.44	6.44	41.4736	0	PSCQ (Skinner et al., 1986).	Coercion	1	0.87	urgency	1	better urgency	0.87	1512	51	-0.284	1	1	-0.292028	0.00510204
789	Patouris, Scaife & Nobes	2016	Journal of Substance Use		UK	89	35	66	789		199	1	16.44	6.44	41.4736	0	PSCQ (Skinner et al., 1986).	Coercion	1	0.87	sensation seeking	1	more impulsivity	0.87	1518	51	-0.038	1	1	-0.0380183	0.00510204
789	Patouris, Scaife & Nobes	2016	Journal of Substance Use		UK	89	35	66	789		199	1	16.44	6.44	41.4736	0	PSCQ (Skinner et al., 1986).	Coercion	1	0.87	lack of premeditation	1	more impulsivity	0.87	1524	51	-0.184	1	1	-0.18612	0.00510204
789	Patouris, Scaife & Nobes	2016	Journal of Substance Use		UK	89	35	66	789		199	1	16.44	6.44	41.4736	0	PSCQ (Skinner et al., 1986).	Coercion	1	0.87	lack of perseverence	1	more impulsivity	0.87	1530	51	-0.14	1	1	-0.140926	0.00510204
9999	Schofield, Conger & Conger	2017	Development and Psychopathology	0	USA	91	40	62	9999	Family Transitions Project	558	1					hostility, angry coercion, physical attacks, antisocial behavior	consists of coercion, physical attacks and hostility	3	0.91	self-control	2	more self-control		9991	58	-0.25	2	1	-0.255413	0.0018018
9991	Beckmann	2017	Journal of Interpersonal Violence	0	Germany	67	35	66	9991	school surveys Lower Saxony	6429	1	14.88	4.88	23.8144	0	Parent-child Conflict tactics Scale (Straus et al. 1998)	Physical abuse	1	0.85	self-control	1	more self-control	0.86	9992	0	-0.12	1	1	-0.120581	0.000155618
9991	Beckmann	2017	Journal of Interpersonal Violence		Germany	67	35	66	9991	school surveys Lower Saxony	6429	1	14.88	4.88	23.8144	0	Parent-child Conflict tactics Scale (Straus et al. 1998)	Verbal abuse	1	0.79	self-control	1	more self-control	0.86	9993	0	-0.113	1	1	-0.113485	0.000155618
9991	Beckmann	2017	Journal of Interpersonal Violence		Germany	67	35	66	9991	school surveys Lower Saxony	6429	1	14.88	4.88	23.8144	0	Parent-child Conflict tactics Scale (Straus et al. 1998)	Physical abuse	1	0.85	self-control	1	more self-control	0.86	9994	100	-0.183	1	1	-0.185085	0.000155618
9991	Beckmann	2017	Journal of Interpersonal Violence		Germany	67	35	66	9991	school surveys Lower Saxony	6429	1	14.88	4.88	23.8144	0	Parent-child Conflict tactics Scale (Straus et al. 1998)	Verbal abuse	1	0.79	self-control	1	more self-control	0.86	9995	100	-0.178	1	1	-0.179916	0.000155618

## Sheet: Legend
LEGEND
Study_ID	Study ID, every study has a unique ID (not used in the analyses)
Author	(First) author names
PubYear	Year of publication
Journal	Journal
Excl_overlap	0= independent studies 1= dependent studies
Country	Country of study
Hofstede_individualism	Individualism score
Hofstede_power	Power distance score
Hofstede_masculinity	Masculinity score
Study_ID_2	Study ID 2, taking into account dependency between studies. Studies with the same sample have the same study ID. This was used for the analyses.
Sample	Sample name
N_es	Sample size
ES_design	1=cross-sectional 2=longitudinal
Age	Age
Age_cent10	Age centerd at 10
Age_cent10_sq	Age squared
time_lag	time lag between family violence and self-control
violence_items	family violence items
violence	details on violence
Informant_parenting	informant parenting 1=self-report, 2= other report 3= composite
Alpha_parenting	cronbach alpha parenting
term_sc	term self-control
informant_sc	informant self-control 1=self-report, 2= other report 3= composite
meaning_sc	meaning self-control
alpha_sc	cronbach alpha self-control scale
ES_ID	effect size ID, with every effect size having a unique effect size ID
ES_gender_continious	% of girls
ES	effect size
Informants_consistency	consistency informants
ES_count	Number of effect sizes
ES_fisher	effect size transformed to fisher z (see https://www.meta-analysis.com/downloads/Meta-analysis%20Effect%20sizes%20based%20on%20correlations.pdf)
ES_VAR	variance of fisher z (see https://www.meta-analysis.com/downloads/Meta-analysis%20Effect%20sizes%20based%20on%20correlations.pdf)
